# Supplementary material for: A review of alterations to the brain during spaceflight and the potential relevance to crew in long-duration space exploration
Source: PubMed Central journal article supplement (PMC7887220; doi:10.1038/s41526-021-00133-z), 2021-02-16
Supplement: 41526_2021_133_MOESM1_ESM.pdf [file 41526_2021_133_MOESM1_ESM.pdf]

1 **Supplementary Material**

2

| Group              | Sequence                                      | Physics                                                                                               | Characteristics                                                                                                                                                  | Utility                                                                                                |
|--------------------|-----------------------------------------------|-------------------------------------------------------------------------------------------------------|------------------------------------------------------------------------------------------------------------------------------------------------------------------|--------------------------------------------------------------------------------------------------------|
| Spin Echo          | T1-Weighted MRI                               | Longitudinal, spin-lattice relaxation                                                                 | Low signal intensity of tissue with high water content, high signal intensity of high fat tissue (white matter) <sup>1</sup>                                     | Good anatomical detail, macroscopic overview of tissue <sup>1</sup>                                    |
|                    | T2-Weighted MRI                               | Transverse, spin-spin relaxation                                                                      | High signal intensity of tissue with high water content (edema, infarction, inflammation), intermediate intensity of high fat tissue (white matter) <sup>1</sup> | Foundational overview of standard brain anatomy, assists in evaluation of brain pathology <sup>1</sup> |
| Inversion Recovery | Fluid-attenuated inversion recovery           | Selective suppression of fluid (CSF) signal                                                           | Reduced intensity of CSF signal, high signal intensity of tissue edema/inflammation <sup>2</sup>                                                                 | Distinguishes subtle white matter abnormalities <sup>2</sup>                                           |
| Diffusion Weighted | Conventional Diffusion Weighted Imaging (DWI) | Measures the diffusion of water molecules                                                             | Increased signal intensity in areas with restricted diffusion of water <sup>3</sup>                                                                              | Allows mapping of the diffusion of water within the brain <sup>3</sup>                                 |
|                    | Diffusion Tensor Imaging (DTI)                | Measures the anisotropic diffusion of water in the brain                                              | Estimation of axonal (white matter) organization within the brain <sup>4</sup>                                                                                   | Assessment of white matter tracts, deformations of white matter secondary to brain pathology           |
| Functional MRI     | Blood-oxygen-level-dependent (BOLD) imaging   | Measures properties of hemoglobin to assess local changes in blood flow, with correlation to activity | Identification of regions of activity within the brain <sup>5</sup>                                                                                              | Visualization of areas of increased cortical activity during rest or activation <sup>5</sup>           |

3

4 **Supplementary Table 1.** Overview of MRI sequence types utilized in the studies discussed  
5 within this review.

6

7

8

9

10

11

12

13

| Structure                                                               | Function                                                                                                                                                                             | System                                       | Functional Symptoms                                                                                                                                                                                                                                                                                   |
|-------------------------------------------------------------------------|--------------------------------------------------------------------------------------------------------------------------------------------------------------------------------------|----------------------------------------------|-------------------------------------------------------------------------------------------------------------------------------------------------------------------------------------------------------------------------------------------------------------------------------------------------------|
| Superior Longitudinal Fasciculus (Right) <sup>6</sup>                   | Connects the frontal, occipital, parietal, and temporal lobes. Visuospatial attention (goal-directed, stimulus driven) and motor control. <sup>7</sup>                               | Visual, motor, cognitive, behavioral         | Observed: Crewmembers with the largest spaceflight-associated balance disruptions had greater WM structure changes in the SLF <sup>6</sup><br><br>Potential: Visuospatial cognitive dysfunction (searching, shifting spatial attention, performing mental rotations, detecting patterns) <sup>7</sup> |
| Inferior Longitudinal Fasciculus <sup>6</sup>                           | Connects temporal and occipital lobes. Visual modality, object/face/place processing, emotional processing, visual memory. <sup>8</sup>                                              | Visual, cognitive, behavioral                | Potential: Visual neglect, visual amnesia, visual hallucinations, prosopagnosia, visual hypo-emotionality <sup>8</sup>                                                                                                                                                                                |
| Inferior Occipitofrontal Fasciculus <sup>6</sup>                        | Connects frontal and occipital/temporal lobes. Hypothesized role in spatial attention and cognition (non-dominant), goal-oriented behavior, social cognition, attention <sup>9</sup> | Visual, cognitive, behavioral                | Potential: Reduced verbal fluency, spatial neglect, anosognosia, potential for inability to identify facial emotions <sup>9</sup>                                                                                                                                                                     |
| R. posterior thalamic radiations <sup>10</sup>                          | Posterior radiations connect thalamus and occipital cortex, contain optic radiations. <sup>11</sup>                                                                                  | Visual                                       | Potential: Visual pathway deficits <sup>11</sup>                                                                                                                                                                                                                                                      |
| Calcarine, middle occipital, inferior occipital gyri <sup>10</sup>      | Location of the primary visual cortex and secondary visual association cortex <sup>12</sup>                                                                                          | Visual, cognitive                            | Potential: Visual hallucinations, visual field cuts <sup>12</sup>                                                                                                                                                                                                                                     |
| Right fusiform gyrus <sup>10</sup>                                      | Facial and word recognition, within-category identification <sup>13</sup>                                                                                                            | Visual, cognitive, behavioral                | Potential: Prosopagnosia, dyslexia <sup>13</sup>                                                                                                                                                                                                                                                      |
| Inferior cerebellar peduncle <sup>6</sup>                               | Connects the cerebellum to the spinal cord and medulla. Carries input from vestibular receptors (afferent and efferent) to help with posture, balance, coordination. <sup>14</sup>   | Cerebellar, vestibular                       | Potential: Vertigo and imbalance mimicking a peripheral vestibular issue, ocular tilt, spontaneous nystagmus <sup>14</sup>                                                                                                                                                                            |
| Middle cerebellar peduncle <sup>6</sup>                                 | Afferent pathway from pons to cerebellum. Controls the initiation, planning and timing of volitional motor activity <sup>15</sup>                                                    | Cerebellar, motor                            | Potential: Cerebellar ataxia (limb, gait, speech) <sup>15</sup>                                                                                                                                                                                                                                       |
| Corticospinal Tract <sup>6</sup>                                        | Efferent motor information from the cerebral cortex to the body <sup>16</sup>                                                                                                        | Motor                                        | Potential: Central motor weakness <sup>16</sup>                                                                                                                                                                                                                                                       |
| White matter underlying primary motor and sensory cortices <sup>6</sup> | Afferent and efferent motor and sensory information, sensory integration <sup>17,18</sup>                                                                                            | Motor, somatosensory, vestibular, cognitive  | Potential: Impairment in voluntary movement, sensory ataxia, altered sensory perception of somatosensory input and vestibular equilibrium <sup>17,18</sup>                                                                                                                                            |
| Inferior and posterior parietal lobe <sup>6</sup>                       | Body spatial representation, central vestibular and proprioceptive processing, vertical upright perception <sup>19</sup>                                                             | Somatosensory, vestibular, cognitive         | Potential: Sensorimotor deficits, including deficits in perception and spatial memory, inaccurate reaching and grasping, inattention, deficits in trunk and limb orientation <sup>19,20</sup>                                                                                                         |
| Thalamus <sup>10</sup>                                                  | Relays information between cortex and subcortical areas. <sup>21</sup>                                                                                                               | Visual, somatosensory, cognitive, behavioral | Potential: Neuropsychological disturbances, motor weakness or sensory loss, deficits in episodic memory, executive function, processing speed, directed attention, working memory <sup>21</sup>                                                                                                       |
| Frontal poles <sup>22</sup>                                             | Higher order cognition, emotion, goal directed behavior, task prioritization <sup>23</sup>                                                                                           | Cognitive, behavioral                        | Potential: Loss of empathy, difficulty re-prioritizing tasks <sup>23</sup>                                                                                                                                                                                                                            |

|                                                                |                                                                                                                               |                                      |                                                                                                                                                                                                                                                                                                 |
|----------------------------------------------------------------|-------------------------------------------------------------------------------------------------------------------------------|--------------------------------------|-------------------------------------------------------------------------------------------------------------------------------------------------------------------------------------------------------------------------------------------------------------------------------------------------|
| Temporal Poles <sup>22</sup>                                   | Semantic naming, facial recognition, integration of emotion with sensory information. <sup>24</sup>                           | Visual, cognitive, behavioral        | Potential: Social withdrawal, failure to produce appropriate social signals or recognize them, self-centered, loss of empathy, unstable mood states. <sup>24</sup>                                                                                                                              |
| Supplementary Motor Region <sup>25,26</sup>                    | Self-initiated movement, stimulus-cued movement, speech production, temporal triggering. <sup>27,28</sup>                     | Motor, visual, cognitive, behavioral | Potential: Akinesia, speech deficits, executive working memory deficits <sup>27,28</sup>                                                                                                                                                                                                        |
| Premotor Region <sup>25</sup>                                  | Integration of visuospatial information for movement planning, both external and internal memory-based <sup>29</sup>          | Visual, motor, cognitive, behavioral | Potential: Impaired performance of visually and verbally cued tasks, difficulty initiating memory cued tasks, motor apraxia <sup>30</sup>                                                                                                                                                       |
| Primary Sensorimotor Region <sup>25</sup>                      | Integration of sensory and motor skills needed for skilled movement <sup>18</sup>                                             | Motor, somatosensory                 | Potential: Impaired cross motor function and reflexes, impaired fine motor skills, disrupted learning of new motor tasks <sup>18</sup>                                                                                                                                                          |
| Left Caudate Nucleus <sup>25</sup>                             | Voluntary movement, postural control, cognitive planning of adaptive goal-directed behavior. <sup>31</sup>                    | Motor, somatosensory, cognitive      | Observed: Decrement in postural control on Recovery from Fall/Stand Test, Dynamic Postural Stability Test. <sup>25</sup><br><br>Potential: Gait disturbances, slowed walking speed. Impaired visual discrimination, alternation behavior, cognitive-driven strategy switching. <sup>31-33</sup> |
| Lower Extremity Primary Motor Area/Mid-Cingulate <sup>25</sup> | Motor execution. Processing of internal/external states (emotional states) and translation into motor commands. <sup>34</sup> | Motor, cognitive, behavioral         | Potential: Impaired movement <sup>34</sup>                                                                                                                                                                                                                                                      |

1  
2  
3  
4  
5  
6  
7  
8  
9  
10  
11  
12  
13  
14  
15  
16  
17  
18

**Supplementary Table 2.** Correlation between the structure/connectivity alterations seen with neuroimaging after spaceflight, their relationship to major CNS pathways, and the predicted sensorimotor/cognitive/behavioral symptoms associated with deficits within the pathway.

1 **References**

- 2 1 DG, M. *MRI Principles*. (Saunders, 2004).
- 3 2 Okuda, T. *et al.* Brain lesions: when should fluid-attenuated inversion-recovery  
4 sequences be used in MR evaluation? *Radiology* **212**, 793-798,  
5 doi:10.1148/radiology.212.3.r99se07793 (1999).
- 6 3 Hagmann, P. *et al.* Understanding diffusion MR imaging techniques: from scalar  
7 diffusion-weighted imaging to diffusion tensor imaging and beyond. *Radiographics* **26**  
8 **Suppl 1**, S205-223, doi:10.1148/rg.26si065510 (2006).
- 9 4 Jellison, B. J. *et al.* Diffusion tensor imaging of cerebral white matter: a pictorial review of  
10 physics, fiber tract anatomy, and tumor imaging patterns. *AJNR Am J Neuroradiol* **25**,  
11 356-369 (2004).
- 12 5 Khanna, N., Altmeyer, W., Zhuo, J. & Steven, A. Functional Neuroimaging: Fundamental  
13 Principles and Clinical Applications. *Neuroradiol J* **28**, 87-96,  
14 doi:10.1177/1971400915576311 (2015).
- 15 6 Lee, J. K. *et al.* Spaceflight-Associated Brain White Matter Microstructural Changes and  
16 Intracranial Fluid Redistribution. *JAMA Neurol* **76**, 412-419,  
17 doi:10.1001/jamaneurol.2018.4882 (2019).
- 18 7 Conner, A. K. *et al.* A Connectomic Atlas of the Human Cerebrum-Chapter 10:  
19 Tractographic Description of the Superior Longitudinal Fasciculus. *Oper Neurosurg*  
20 *(Hagerstown)* **15**, S407-S422, doi:10.1093/ons/opy264 (2018).
- 21 8 Sali, G. *et al.* A Connectomic Atlas of the Human Cerebrum-Chapter 11: Tractographic  
22 Description of the Inferior Longitudinal Fasciculus. *Oper Neurosurg (Hagerstown)* **15**,  
23 S423-S428, doi:10.1093/ons/opy265 (2018).
- 24 9 Conner, A. K. *et al.* A Connectomic Atlas of the Human Cerebrum-Chapter 13:  
25 Tractographic Description of the Inferior Fronto-Occipital Fasciculus. *Oper Neurosurg*  
26 *(Hagerstown)* **15**, S436-S443, doi:10.1093/ons/opy267 (2018).
- 27 10 Riascos, R. F. *et al.* Longitudinal Analysis of Quantitative Brain MRI in Astronauts  
28 Following Microgravity Exposure. *J Neuroimaging* **29**, 323-330, doi:10.1111/jon.12609  
29 (2019).
- 30 11 Prasad, S. & Galetta, S. L. Anatomy and physiology of the afferent visual system. *Handb*  
31 *Clin Neurol* **102**, 3-19, doi:10.1016/B978-0-444-52903-9.00007-8 (2011).
- 32 12 Baker, C. M. *et al.* A Connectomic Atlas of the Human Cerebrum-Chapter 9: The  
33 Occipital Lobe. *Oper Neurosurg (Hagerstown)* **15**, S372-S406, doi:10.1093/ons/opy263  
34 (2018).
- 35 13 Weiner, K. S. & Zilles, K. The anatomical and functional specialization of the fusiform  
36 gyrus. *Neuropsychologia* **83**, 48-62, doi:10.1016/j.neuropsychologia.2015.06.033 (2016).
- 37 14 Choi, J. H. *et al.* Inferior cerebellar peduncular lesion causes a distinct vestibular  
38 syndrome. *Eur J Neurol* **22**, 1062-1067, doi:10.1111/ene.12705 (2015).
- 39 15 Morales, H. & Tomsick, T. Middle cerebellar peduncles: Magnetic resonance imaging  
40 and pathophysiologic correlate. *World J Radiol* **7**, 438-447, doi:10.4329/wjr.v7.i12.438  
41 (2015).
- 42 16 Van Wittenberghe, I. C. & Peterson, D. C. in *StatPearls* (2020).
- 43 17 Bashir, S. *et al.* Short-term effects of unilateral lesion of the primary motor cortex (M1)  
44 on ipsilesional hand dexterity in adult macaque monkeys. *Brain Struct Funct* **217**, 63-79,  
45 doi:10.1007/s00429-011-0327-8 (2012).
- 46 18 Borich, M. R., Brodie, S. M., Gray, W. A., Ionta, S. & Boyd, L. A. Understanding the role  
47 of the primary somatosensory cortex: Opportunities for rehabilitation. *Neuropsychologia*  
48 **79**, 246-255, doi:10.1016/j.neuropsychologia.2015.07.007 (2015).
- 49 19 Freund, H. J. Somatosensory and motor disturbances in patients with parietal lobe  
50 lesions. *Adv Neurol* **93**, 179-193 (2003).

- 1 20 Darling, W. G., Bartelt, R. & Rizzo, M. Unilateral posterior parietal lobe lesions disrupt  
2 kinaesthetic representation of forearm orientation. *J Neurol Neurosurg Psychiatry* **75**,  
3 428-435, doi:10.1136/jnnp.2003.026138 (2004).
- 4 21 Fama, R. & Sullivan, E. V. Thalamic structures and associated cognitive functions:  
5 Relations with age and aging. *Neurosci Biobehav Rev* **54**, 29-37,  
6 doi:10.1016/j.neubiorev.2015.03.008 (2015).
- 7 22 Koppelmans, V., Bloomberg, J. J., Mulavara, A. P. & Seidler, R. D. Brain structural  
8 plasticity with spaceflight. *NPJ Microgravity* **2**, 2, doi:10.1038/s41526-016-0001-9 (2016).
- 9 23 Pirau, L. & Lui, F. in *StatPearls* (2020).
- 10 24 Olson, I. R., Plotzker, A. & Ezzyat, Y. The Enigmatic temporal pole: a review of findings  
11 on social and emotional processing. *Brain* **130**, 1718-1731, doi:10.1093/brain/awm052  
12 (2007).
- 13 25 Roberts, D. R. *et al.* Prolonged Microgravity Affects Human Brain Structure and  
14 Function. *AJNR Am J Neuroradiol*, doi:10.3174/ajnr.A6249 (2019).
- 15 26 Hupfeld, K. E. *et al.* The Impact of 6 and 12 Months in Space on Human Brain Structure  
16 and Intracranial Fluid Shifts. *Cereb Cortex Commun* **1**, tgaa023,  
17 doi:10.1093/texcom/tgaa023 (2020).
- 18 27 Lima, C. F., Krishnan, S. & Scott, S. K. Roles of Supplementary Motor Areas in Auditory  
19 Processing and Auditory Imagery. *Trends Neurosci* **39**, 527-542,  
20 doi:10.1016/j.tins.2016.06.003 (2016).
- 21 28 Picard, N. & Strick, P. L. Activation of the supplementary motor area (SMA) during  
22 performance of visually guided movements. *Cereb Cortex* **13**, 977-986,  
23 doi:10.1093/cercor/13.9.977 (2003).
- 24 29 Mazurek, K. A. & Schieber, M. H. Injecting Instructions into Premotor Cortex. *Neuron* **96**,  
25 1282-1289 e1284, doi:10.1016/j.neuron.2017.11.006 (2017).
- 26 30 Purves D, A. G., Fitzpatrick D, et al., editors. in *Neuroscience. 2nd Edition.* (Sinaeur  
27 Associates, 2001).
- 28 31 Grahn, J. A., Parkinson, J. A. & Owen, A. M. The cognitive functions of the caudate  
29 nucleus. *Prog Neurobiol* **86**, 141-155, doi:10.1016/j.pneurobio.2008.09.004 (2008).
- 30 32 Lee, K. B. *et al.* Brain lesions affecting gait recovery in stroke patients. *Brain Behav* **7**,  
31 e00868, doi:10.1002/brb3.868 (2017).
- 32 33 Pasquini, J. *et al.* Clinical implications of early caudate dysfunction in Parkinson's  
33 disease. *J Neurol Neurosurg Psychiatry* **90**, 1098-1104, doi:10.1136/jnnp-2018-320157  
34 (2019).
- 35 34 Strick, P. L., Dum, R. P. & Picard, N. Motor areas on the medial wall of the hemisphere.  
36 *Novartis Found Symp* **218**, 64-75; discussion 75-80, 104-108 (1998).
